# Supplementary material for: New generation breast cancer cell lines developed from patient-derived xenografts
Source: Springer Nature journal article supplement (doi:10.1186/s13058-020-01300-y), 2020-06-23
Supplement: MOESM1 [file 18112532]

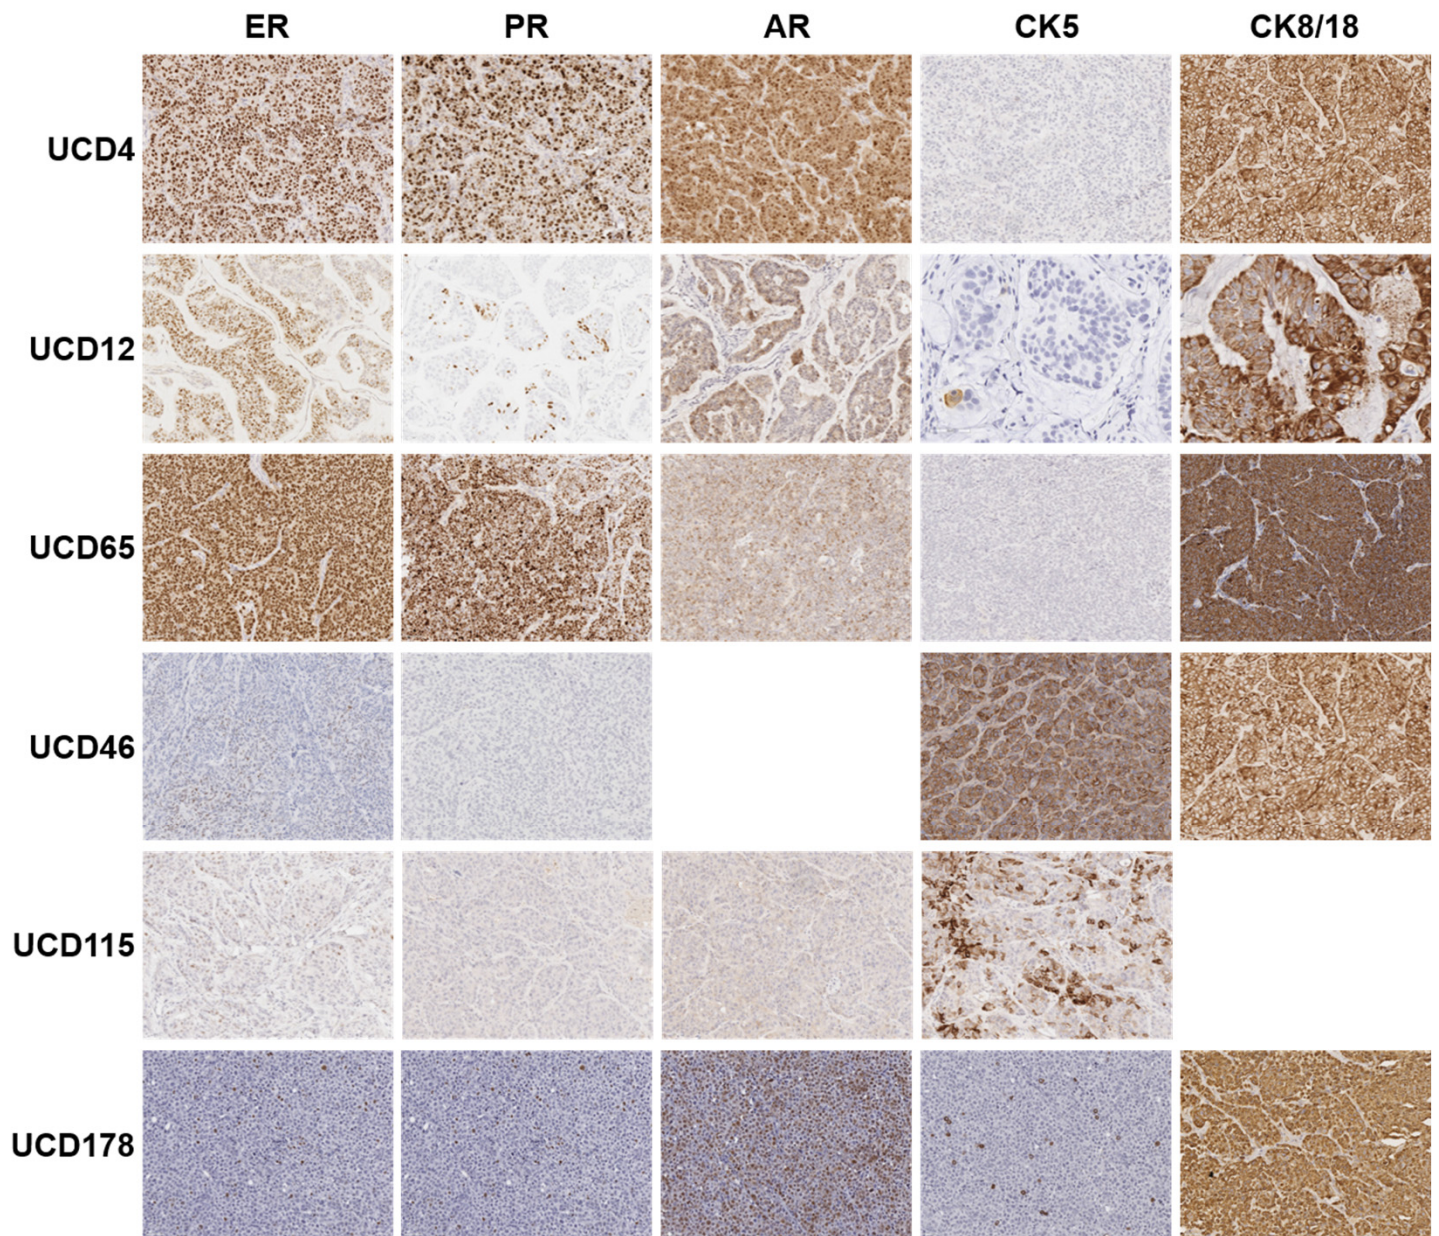

**Supplemental Figure 1.** IHC of PDX from which cell lines were derived. PDX were stained with antibodies to ER, PR, AR, CK5, and CK8/18. Slides were loaded into Aperio digital slide viewer and images captured at 40x magnification with Imagescope (Leica).



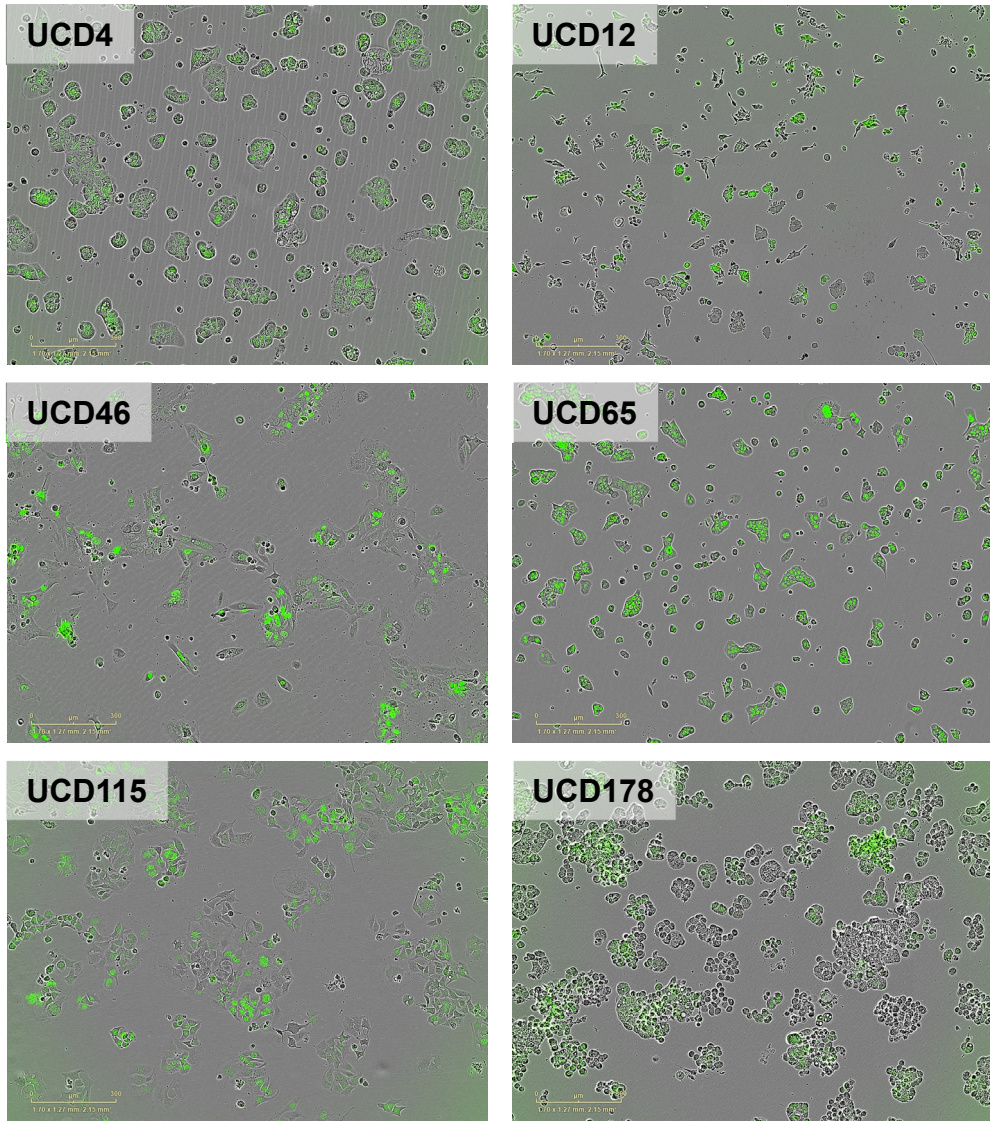

**Supplemental Figure 2.** Nuclear-GFP labeled UCD cell lines for proliferation assays. Representative images of UCD cell lines during Incucyte analysis. Individual wells were captured at 6-18 h post plating. Mag bars, 300 microns.

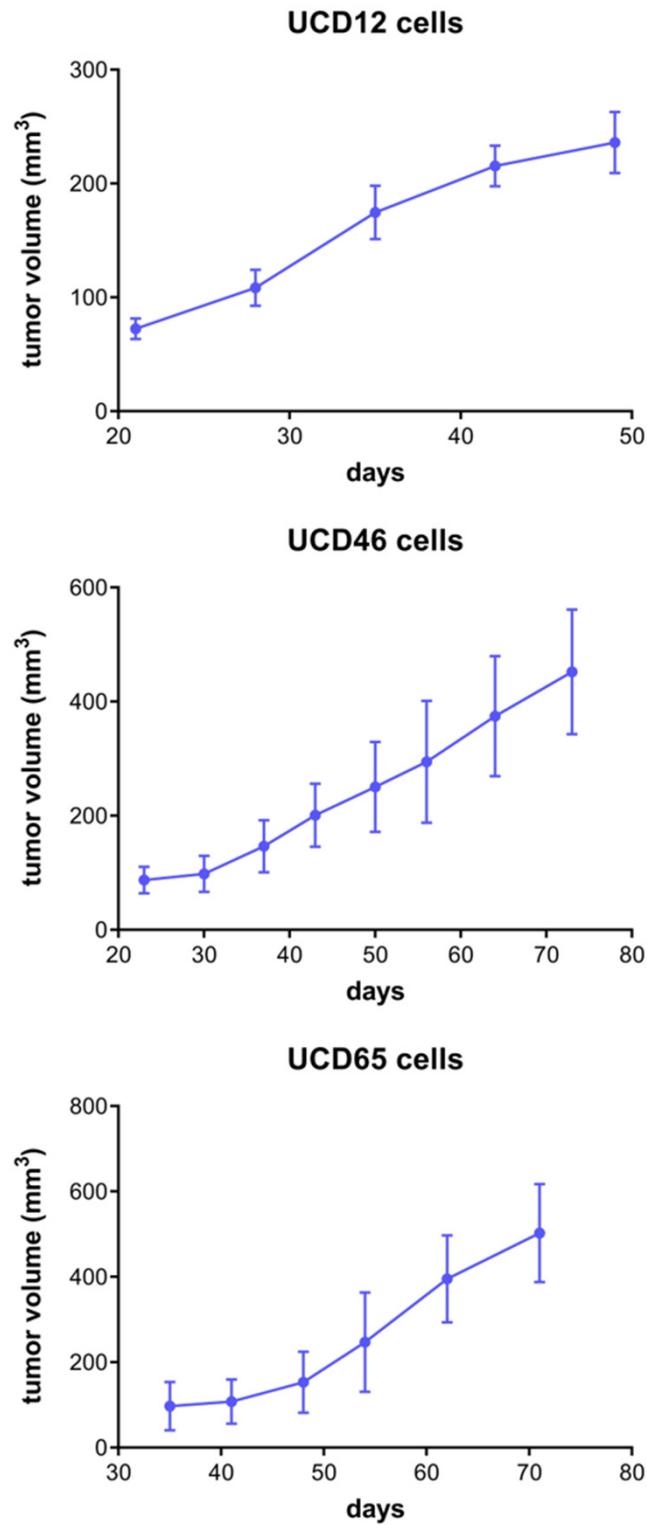

**Supplemental Figure 3.** Growth of UCD cell lines in vivo. One million cells were inoculated bilaterally into the #4 mammary fat pads of NSG mice. Animals were supplemented with slow release estrogen pellets and tumors measure weekly. Mean plus SEM are indicated. N=6 tumors UCD12 and UCD47 and N=3 tumors for UCD65.

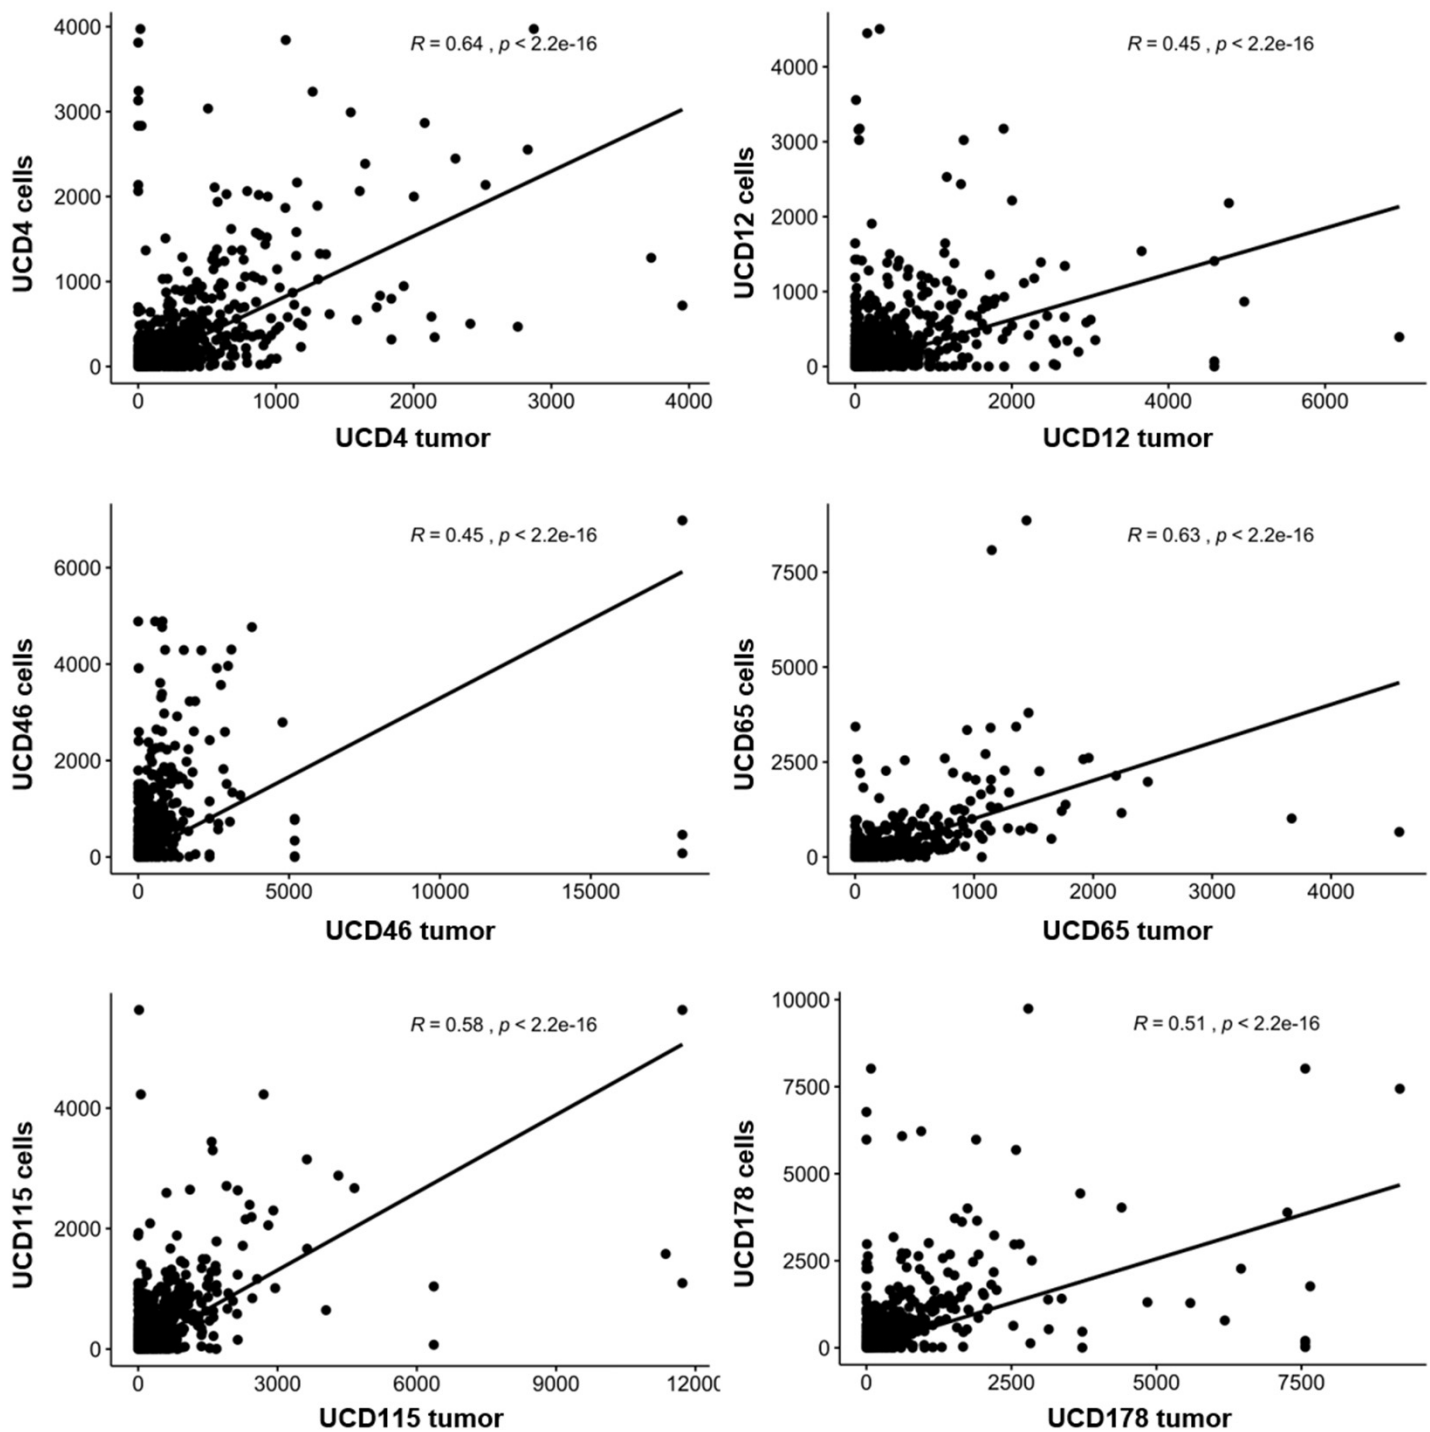

**Supplemental Figure 4.** Expression profiles of UCD cell lines show moderate to strong positive correlation to their PDX tumors of origin. The RNA-seq expression profiles (FPKM) of UCD cell lines and UCD PDX were compared using the r package ggpubr. The  $r^2$  correlation and p values were plotted for each cell line and the corresponding PDX.

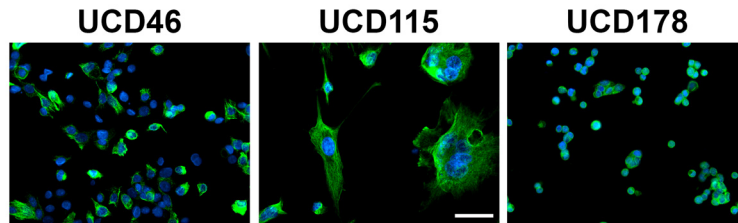

**Supplementary Figure 5.** Vimentin expression in ER negative UCD cell lines. UCD46, UCD115, and UCD178 cells were plated on glass slides in regular media. Cells were fixed and stained by immunocytochemistry with an antibody to vimentin with DAPI counterstain. Scale bar, 50  $\mu$ M.
